# Supplementary material for: The Effect and Safety of 5‐HT1F Receptor Agonist Lasmiditan on Migraine: A Systematic Review and Meta‐Analysis
Source: Hindawi journal article supplement (doi:10.1155/2021/6663591), 2021-01-01

### a 50 mg versus 100 mg

| Study or Subgroup       | 50 mg  |            | 100 mg |            | Weight        | Risk Ratio               |
|-------------------------|--------|------------|--------|------------|---------------|--------------------------|
|                         | Events | Total      | Events | Total      |               | M-H, Random, 95% CI      |
| Färkkilä M et al., 2012 | 53     | 82         | 59     | 82         | 46.9%         | 0.90 [0.73, 1.11]        |
| Goadsby PJ et al., 2019 | 166    | 654        | 229    | 635        | 53.1%         | 0.70 [0.60, 0.83]        |
| <b>Total (95% CI)</b>   |        | <b>736</b> |        | <b>717</b> | <b>100.0%</b> | <b>0.79 [0.61, 1.02]</b> |
| Total events            | 219    |            | 288    |            |               |                          |

Heterogeneity: Tau<sup>2</sup> = 0.02; Chi<sup>2</sup> = 3.55, df = 1 (P = 0.06); I<sup>2</sup> = 72%  
 Test for overall effect: Z = 1.84 (P = 0.07)

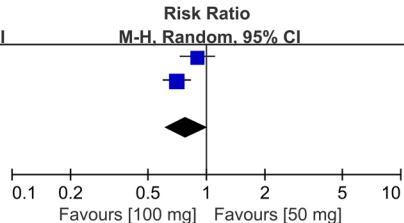

### b 100 mg versus 200 mg

| Study or Subgroup       | 100 mg |             | 200 mg |             | Weight        | Risk Ratio               |
|-------------------------|--------|-------------|--------|-------------|---------------|--------------------------|
|                         | Events | Total       | Events | Total       |               | M-H, Fixed, 95% CI       |
| Färkkilä M et al., 2012 | 59     | 82          | 61     | 71          | 11.3%         | 0.84 [0.71, 0.99]        |
| Goadsby PJ et al., 2019 | 229    | 635         | 253    | 649         | 43.1%         | 0.93 [0.80, 1.07]        |
| Kuca B et al., 2018     | 229    | 630         | 260    | 609         | 45.6%         | 0.85 [0.74, 0.98]        |
| <b>Total (95% CI)</b>   |        | <b>1347</b> |        | <b>1329</b> | <b>100.0%</b> | <b>0.88 [0.81, 0.96]</b> |
| Total events            | 517    |             | 574    |             |               |                          |

Heterogeneity: Chi<sup>2</sup> = 1.06, df = 2 (P = 0.59); I<sup>2</sup> = 0%  
 Test for overall effect: Z = 2.75 (P = 0.006)

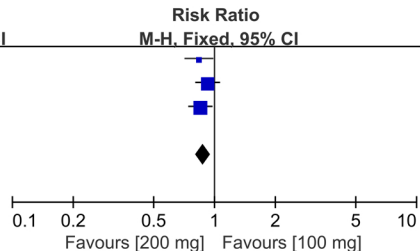

### c 200 mg versus 50 mg

| Study or Subgroup       | 50 mg  |            | 200 mg |            | Weight        | Risk Ratio               |
|-------------------------|--------|------------|--------|------------|---------------|--------------------------|
|                         | Events | Total      | Events | Total      |               | M-H, Fixed, 95% CI       |
| Färkkilä M et al., 2012 | 53     | 82         | 61     | 71         | 20.5%         | 0.75 [0.62, 0.91]        |
| Goadsby PJ et al., 2019 | 166    | 654        | 253    | 649        | 79.5%         | 0.65 [0.55, 0.77]        |
| <b>Total (95% CI)</b>   |        | <b>736</b> |        | <b>720</b> | <b>100.0%</b> | <b>0.67 [0.59, 0.77]</b> |
| Total events            | 219    |            | 314    |            |               |                          |

Heterogeneity: Chi<sup>2</sup> = 1.57, df = 1 (P = 0.21); I<sup>2</sup> = 36%  
 Test for overall effect: Z = 5.83 (P < 0.00001)

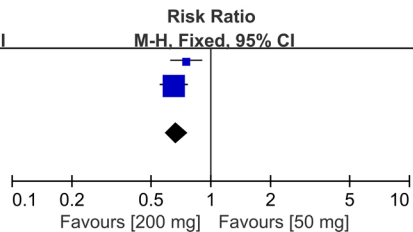

Supplement: f3 [file 6663591.f3.pdf]
